# Supplementary material for: Cluster Analysis and Comparison of Various Chloroplast Transcriptomes and Genes in Arabidopsis thaliana
Source: PubMed Central journal article supplement — DNA Res. 2008 Dec 23;16(1):31–44. doi: 10.1093/dnares/dsn031 (PMC2646353; doi:10.1093/dnares/dsn031), 2008-12-23
Supplement: dsn031_2.pdf [file dsn031_2.pdf]

**Table S3.** Distribution of co-expressed plastid genes within the 8 identified classes shown in Fig. 3A.

|         |          |                                                                                                                                                |
|---------|----------|------------------------------------------------------------------------------------------------------------------------------------------------|
| Class A | 10 genes | <i>rps15, rrn4.5S, trnP-ugg, trnL-uag, rps18, trnK-uuu, trnF-gaa, ycf15/orf77, accD, atpH,</i>                                                 |
| Class B | 10 genes | <i>rpoB, rps7, rps12, ycf2.1, ycf4, <u>ndhC, ndhK</u>,<sup>1</sup> <u>atpA, atpF, atpI,</u></i>                                                |
| Class C | 12 genes | <i><u>rpoC2, rpoC1, rpl20, rpl16, rps4, rps8, rps16, trnfM-cau, ndhB, ycf5, atpB, atpE</u></i>                                                 |
| Class D | 13 genes | <i><u>rpoA, rpl14, rpl36, rps11, rrn23S, trnA-ugc, trnI-cau, clpP, ycf3, cemA/ycf10, ndhA, ndhH,</u></i><br><i><u>ndhJ,</u></i>                |
| Class E | 8 genes  | <i><u>rrn16S, rrn5S, trnE-uuc, ndhF, psbM, psaB, psaI, petL/orf31,</u></i>                                                                     |
| Class F | 15 genes | <i><u>rps2, trnI-gau, trnR-acg, psbD, psbC, psbZ/ycf9, psbF, psbL, psbJ, psbI, psaJ, petN/ycf6, petG,</u></i><br><i><u>ndhE, rbcL,</u></i>     |
| Class G | 10 genes | <i><u>rpl23, rpl2, rps19, rpl22, rps3, rpl32, rps14, rpl33, ycf1, ndhD,</u></i>                                                                |
| Class H | 16 genes | <i><u>trnV-gac, matK, psbA, psbK, psbE, psbN, psbB, psbT<sub>c</sub>, psbH, petB, petD, petA, psaA, psaC,</u></i><br><i><u>ndhG, ndhI,</u></i> |

<sup>1</sup>Underlined genes are part of same operons
