# Supplementary material for: Cluster Analysis and Comparison of Various Chloroplast Transcriptomes and Genes in Arabidopsis thaliana
Source: PubMed Central journal article supplement — DNA Res. 2008 Dec 23;16(1):31–44. doi: 10.1093/dnares/dsn031 (PMC2646353; doi:10.1093/dnares/dsn031), 2008-12-23
Supplement: dsn031_3.pdf [file dsn031_3.pdf]

**Table S4.** Co-transcribed plastid genes found to be tightly co-expressed as determined by hierarchical clustering analysis of 89 transcriptomes.

| <b>Clusters of homogeneous function</b> | <b>Clusters of heterogeneous function</b>       |
|-----------------------------------------|-------------------------------------------------|
| <i>psbD, psbC</i>                       | <i>rpl14, rpl36, rps11, rpoA</i>                |
| <i>atpI, atpH</i>                       | <i>trnA-ugc, rrn23S</i>                         |
| <i>atpB, atpE</i>                       | <i>rps15, ndhH, ndhA</i>                        |
| <i>ndhK, ndhJ</i>                       | <i>trnE-uuc, psbM</i>                           |
| <i>rpoC1, rpoC2</i>                     | <i>rrn16S, trnI-gau, rrn5S</i>                  |
| <i>rpl22, rps3</i>                      | <i>psbB, psbT<sub>c</sub>, psbH, petB, petD</i> |
| <i>ndhI, ndhG, ndhE</i>                 | <i>ndhD, psaC</i>                               |
| <i>psbF, psbL</i>                       | <i>psaA, psaB, rps14</i>                        |
| <i>atpF, atpA</i>                       |                                                 |
