# Supplementary material for: Cluster Analysis and Comparison of Various Chloroplast Transcriptomes and Genes in Arabidopsis thaliana
Source: PubMed Central journal article supplement — DNA Res. 2008 Dec 23;16(1):31–44. doi: 10.1093/dnares/dsn031 (PMC2646353; doi:10.1093/dnares/dsn031), 2008-12-23
Supplement: dsn031_4.pdf [file dsn031_4.pdf]

**Table S5.** Putative mRNA metabolism mutants identified by deviations from their expression signatures. Note presence of already described RNA metabolism mutants *pac*, *hcf145*, and *atprfB1*

| <b>Name</b>    | <b>Group</b> | <b>Genes showing a deviated expression</b>                           |
|----------------|--------------|----------------------------------------------------------------------|
| <i>ins20</i>   | A            | <i>psbD, psbC, ndhC, ndhK, rpoC1, rpoC2, ndhG, ndhI, ndhD</i>        |
| <i>ins24</i>   | A            | <i>psbD, psbC, ndhI, ndhG, ndhE</i>                                  |
| <i>ins25</i>   | A            | <i>psbD, psbC</i>                                                    |
| <i>ins26</i>   | A            | <i>psbD, psbC</i>                                                    |
| <i>pac</i>     | A            | <i>psbD, psbC</i>                                                    |
| <i>ins15</i>   | A            | <i>rpl16, rps8</i>                                                   |
| <i>ins36</i>   | A            | <i>ndhK, ndhC</i>                                                    |
| <i>ins21</i>   | A            | <i>psaJ, psaC, psbA, rbcL, rpl15, rps8</i>                           |
| <i>ins34</i>   | B            | <i>rrn4.5S, rrn5S</i>                                                |
| <i>hcf145</i>  | B            | <i>psaA, psaB</i>                                                    |
| <i>crp102</i>  | B            | <i>ndhI, ndhG, ndhE, atpH, atpI, atpF, atpA</i>                      |
| <i>crp135</i>  | B            | <i>psbB, psbT<sub>c</sub>, rpoC1, rpoC2, accD, ycf10, petA, clpP</i> |
| <i>atprfB1</i> | B            | <i>psbB, psbT<sub>c</sub></i>                                        |
| <i>ins33</i>   | B            | <i>ndhA, rpoA</i>                                                    |
