# Supplementary material for: Cluster Analysis and Comparison of Various Chloroplast Transcriptomes and Genes in Arabidopsis thaliana
Source: PubMed Central journal article supplement — DNA Res. 2008 Dec 23;16(1):31–44. doi: 10.1093/dnares/dsn031 (PMC2646353; doi:10.1093/dnares/dsn031), 2008-12-23
Supplement: dsn031_5.pdf [file dsn031_5.pdf]

**Table S7.** Co-transcribed plastid genes found to be tightly co-expressed as determined by hierarchical clustering analysis of the transcriptomes of 136 mutants not related to chloroplast functions.

| <b>Clusters of homogeneous function</b> | <b>Clusters of heterogeneous function</b> |
|-----------------------------------------|-------------------------------------------|
| <i>atpB, atpE</i>                       | <i>ndhI, ndhG, ndhE, psaC</i>             |
| <i>petB, petD</i>                       | <i>rps15, ndhH, ndhA</i>                  |
| <i>atpF, atpA</i>                       | <i>psaJ, rpl33, rps18</i>                 |
| <i>psbJ, psbL</i>                       |                                           |
| <i>psbE, psbF</i>                       |                                           |
| <i>ndhJ, ndhK</i>                       |                                           |
| <i>rpl16, rpl14, rps8, rpl36, rps11</i> |                                           |
| <i>psbB, psbT<sub>c</sub></i>           |                                           |
| <i>rpoC1, rpoC2</i>                     |                                           |
| <i>rpl23, rpl2</i>                      |                                           |
| <i>psbI, psbK</i>                       |                                           |
